# Supplementary material for: Coordinating nature of M6L12 double-stranded macrocycles: co-ligand competition of perchlorate, water, and acetonitrile depending on metal(ii) ions
Source: Royal Society of Chemistry journal article supplement (doi:10.1039/d4dt00902a), 2024-01-01
Supplement: d4dt00902a1.pdf [file d4dt00902a1.pdf]

<Electronic Supplementary Information>

**Coordinating nature of  $M_6L_{12}$  double-stranded macrocycles: co-ligand competition of perchlorate, water, and acetonitrile depending on metal(II) ions**

Seonghyeon An,<sup>a</sup> Jihun Han,<sup>a</sup> Dongwon Kim,<sup>a</sup> Haeri Lee<sup>\*b</sup> and Ok-Sang Jung<sup>\*a</sup>

*<sup>a</sup>Department of Chemistry, Pusan National University, Busan 46241, Republic of Korea.*

*Fax: (+82) 51-5163522; Tel: (+82) 51-5103240; E-mail: oksjung@pusan.ac.kr*

*<sup>b</sup>Department of Chemistry, Hannam University, Daejeon 34054, Republic of Korea.*

*E-mail: haeri.lee@hnu.ac.kr*

**Table S1** Crystallographic data

|                                                                          | [Mn <sub>6</sub> (ClO <sub>4</sub> ) <sub>4</sub> (CH <sub>3</sub> CN)<br><sub>2</sub> (H <sub>2</sub> O) <sub>6</sub> L <sub>12</sub> ]8ClO <sub>4</sub> ·C<br>H <sub>3</sub> CN·7C <sub>7</sub> H <sub>8</sub> | [Co <sub>6</sub> (ClO <sub>4</sub> ) <sub>4</sub> (CH <sub>3</sub> CN) <sub>7</sub><br>(H <sub>2</sub> O)L <sub>12</sub> ][Co <sub>6</sub> (ClO <sub>4</sub> ) <sub>4</sub> [Cu <sub>6</sub> (ClO <sub>4</sub> ) <sub>8</sub> (CH <sub>3</sub> CN)<br>(CH <sub>3</sub> CN) <sub>5</sub> (H <sub>2</sub> O) <sub>3</sub> L <sub>12</sub> ] 4L <sub>12</sub> ]4ClO <sub>4</sub> ·5C <sub>7</sub> H <sub>8</sub><br>16ClO <sub>4</sub> ·6C <sub>7</sub> H <sub>8</sub> | [Zn <sub>6</sub> (ClO <sub>4</sub> ) <sub>4</sub> (CH <sub>3</sub> CN) <sub>2</sub><br>(H <sub>2</sub> O) <sub>6</sub> L <sub>12</sub> ]8ClO <sub>4</sub> ·CH<br>O <sub>4</sub> ·4C <sub>7</sub> H <sub>8</sub> | [Cl@Cu <sub>2</sub> (ClO <sub>4</sub> ) <sub>2</sub> L <sub>4</sub> ]Cl<br>O <sub>4</sub> ·4C <sub>7</sub> H <sub>8</sub> |                                                                                                                  |
|--------------------------------------------------------------------------|------------------------------------------------------------------------------------------------------------------------------------------------------------------------------------------------------------------|---------------------------------------------------------------------------------------------------------------------------------------------------------------------------------------------------------------------------------------------------------------------------------------------------------------------------------------------------------------------------------------------------------------------------------------------------------------------|-----------------------------------------------------------------------------------------------------------------------------------------------------------------------------------------------------------------|---------------------------------------------------------------------------------------------------------------------------|------------------------------------------------------------------------------------------------------------------|
| Formula                                                                  | C <sub>295</sub> H <sub>389</sub> Cl <sub>12</sub> Mn <sub>6</sub> N <sub>27</sub> O <sub>54</sub> S<br>i <sub>12</sub>                                                                                          | C <sub>544</sub> H <sub>713</sub> Cl <sub>24</sub> Co <sub>12</sub> N <sub>60</sub> O <sub>100</sub><br>Si <sub>24</sub>                                                                                                                                                                                                                                                                                                                                            | C <sub>566</sub> H <sub>728</sub> Cl <sub>24</sub> Cu <sub>12</sub> N <sub>56</sub> O <sub>96</sub><br>i <sub>24</sub>                                                                                          | C <sub>281</sub> H <sub>373</sub> Cl <sub>12</sub> N <sub>27</sub> O <sub>54</sub> Si <sub>12</sub> Z<br>n <sub>6</sub>   | C <sub>108</sub> H <sub>136</sub> Cl <sub>4</sub> Cu <sub>2</sub> N <sub>8</sub> O <sub>12</sub> Si <sub>4</sub> |
| <i>M<sub>w</sub></i>                                                     | 6269.43                                                                                                                                                                                                          | 11924.82                                                                                                                                                                                                                                                                                                                                                                                                                                                            | 12139.44                                                                                                                                                                                                        | 6147.74                                                                                                                   | 2119.48                                                                                                          |
| Cryst. sys.                                                              | Monoclinic                                                                                                                                                                                                       | Monoclinic                                                                                                                                                                                                                                                                                                                                                                                                                                                          | Orthorhombic                                                                                                                                                                                                    | Monoclinic                                                                                                                | Monoclinic                                                                                                       |
| Space group                                                              | <i>P2<sub>1</sub>/n</i>                                                                                                                                                                                          | <i>P2<sub>1</sub></i>                                                                                                                                                                                                                                                                                                                                                                                                                                               | <i>Iba2</i>                                                                                                                                                                                                     | <i>P2<sub>1</sub>/n</i>                                                                                                   | <i>P2<sub>1</sub>/n</i>                                                                                          |
| <i>a</i> (Å)                                                             | 25.370(5)                                                                                                                                                                                                        | 26.225(5)                                                                                                                                                                                                                                                                                                                                                                                                                                                           | 35.019(7)                                                                                                                                                                                                       | 25.489(5)                                                                                                                 | 16.9088(8)                                                                                                       |
| <i>b</i> (Å)                                                             | 34.527(7)                                                                                                                                                                                                        | 30.532(6)                                                                                                                                                                                                                                                                                                                                                                                                                                                           | 45.420(9)                                                                                                                                                                                                       | 34.525(7)                                                                                                                 | 36.984(2)                                                                                                        |
| <i>c</i> (Å)                                                             | 43.510(9)                                                                                                                                                                                                        | 43.614(9)                                                                                                                                                                                                                                                                                                                                                                                                                                                           | 46.291(9)                                                                                                                                                                                                       | 43.539(9)                                                                                                                 | 17.1187(7)                                                                                                       |
| <i>V</i> (Å <sup>3</sup> )                                               | 37952(13)                                                                                                                                                                                                        | 34555(12)                                                                                                                                                                                                                                                                                                                                                                                                                                                           | 73628(25)                                                                                                                                                                                                       | 38133(13)                                                                                                                 | 10701.8(8)                                                                                                       |
| <i>Z</i>                                                                 | 4                                                                                                                                                                                                                | 2                                                                                                                                                                                                                                                                                                                                                                                                                                                                   | 4                                                                                                                                                                                                               | 4                                                                                                                         | 4                                                                                                                |
| $\rho$ (g cm <sup>-3</sup> )                                             | 1.097                                                                                                                                                                                                            | 1.146                                                                                                                                                                                                                                                                                                                                                                                                                                                               | 1.095                                                                                                                                                                                                           | 1.071                                                                                                                     | 1.315                                                                                                            |
| $\mu$ (mm <sup>-1</sup> )                                                | 0.359                                                                                                                                                                                                            | 0.658                                                                                                                                                                                                                                                                                                                                                                                                                                                               | 0.504                                                                                                                                                                                                           | 0.759                                                                                                                     | 0.605                                                                                                            |
| <i>R<sub>int</sub></i>                                                   | 0.2017                                                                                                                                                                                                           | 0.0465                                                                                                                                                                                                                                                                                                                                                                                                                                                              | 0.0753                                                                                                                                                                                                          | 0.0498                                                                                                                    | 0.1079                                                                                                           |
| GoF on <i>F</i> <sup>2</sup>                                             | 1.192                                                                                                                                                                                                            | 1.022                                                                                                                                                                                                                                                                                                                                                                                                                                                               | 0.912                                                                                                                                                                                                           | 1.824                                                                                                                     | 1.081                                                                                                            |
| <i>R</i> <sub>1</sub> [ <i>I</i> > 2 $\sigma$ ( <i>I</i> )] <sup>a</sup> | 0.2040                                                                                                                                                                                                           | 0.0913                                                                                                                                                                                                                                                                                                                                                                                                                                                              | 0.0577                                                                                                                                                                                                          | 0.1910                                                                                                                    | 0.0620                                                                                                           |
| <i>wR</i> <sub>2</sub> (all data) <sup>b</sup>                           | 0.5800                                                                                                                                                                                                           | 0.2955                                                                                                                                                                                                                                                                                                                                                                                                                                                              | 0.1731                                                                                                                                                                                                          | 0.5596                                                                                                                    | 0.1833                                                                                                           |

<sup>a</sup> $R_1 = \frac{\sum ||F_o| - |F_c||}{\sum |F_o|}$ , <sup>b</sup> $wR_2 = \frac{(\sum [w(F_o^2 - F_c^2)^2])^{1/2}}{\sum [w(F_o^2)^2]}^{1/2}$

**Table S2** Selected bond length (Å) and angle (°)

| <b>[Mn<sub>6</sub>(ClO<sub>4</sub>)<sub>4</sub>(CH<sub>3</sub>CN)<sub>2</sub>(H<sub>2</sub>O)<sub>6</sub>L<sub>12</sub>]<b>8ClO<sub>4</sub>·CH<sub>3</sub>CN·7C<sub>7</sub>H<sub>8</sub></b></b> |           | <b>[Co<sub>6</sub>(ClO<sub>4</sub>)<sub>4</sub>(CH<sub>3</sub>CN)<sub>7</sub>(H<sub>2</sub>O)L<sub>12</sub>][Co<sub>6</sub>(ClO<sub>4</sub>)<sub>4</sub>(CH<sub>3</sub>CN)<sub>5</sub>(H<sub>2</sub>O)<sub>3</sub>L<sub>12</sub>]<b>16ClO<sub>4</sub>·6C<sub>7</sub>H<sub>8</sub></b></b> |           |                                                                                                                        |          |
|--------------------------------------------------------------------------------------------------------------------------------------------------------------------------------------------------|-----------|-------------------------------------------------------------------------------------------------------------------------------------------------------------------------------------------------------------------------------------------------------------------------------------------|-----------|------------------------------------------------------------------------------------------------------------------------|----------|
| O(1A)-Mn(1A)                                                                                                                                                                                     | 2.155(10) | Co(1A)-N(1)                                                                                                                                                                                                                                                                               | 2.16(1)   | Co(1B)-N(37)                                                                                                           | 2.129(8) |
| N(1)-Mn(1A)                                                                                                                                                                                      | 2.119(7)  | Co(1A)-N(2)                                                                                                                                                                                                                                                                               | 2.162(9)  | Co(1B)-N(39)                                                                                                           | 2.171(9) |
| O(1)-Mn(2A)                                                                                                                                                                                      | 2.427(7)  | Co(2A)-O(53)                                                                                                                                                                                                                                                                              | 2.106(8)  | Co(2B)-O(81)                                                                                                           | 2.128(7) |
| O(2A)-Mn(2A)                                                                                                                                                                                     | 2.319(13) | Co(2A)-O(1A)                                                                                                                                                                                                                                                                              | 2.187(8)  | Co(2B)-O(1B)                                                                                                           | 2.216(7) |
| O(5)-Mn(3A)                                                                                                                                                                                      | 2.307(15) | Co(3A)-O(82)                                                                                                                                                                                                                                                                              | 2.075(7)  | Co(3B)-N(58)                                                                                                           | 2.131(9) |
| O(3A)-Mn(3A)                                                                                                                                                                                     | 2.478(13) | Co(3A)-O(5A)                                                                                                                                                                                                                                                                              | 2.221(7)  | Co(3B)-O(5B)                                                                                                           | 2.217(7) |
| O(4A)-Mn(1B)                                                                                                                                                                                     | 2.222(7)  | Co(4A)-N(4)                                                                                                                                                                                                                                                                               | 2.150(10) | Co(4B)-N(56)                                                                                                           | 2.117(8) |
| Mn(1B)-N(2)                                                                                                                                                                                      | 2.188(9)  | Co(4A)-N(3)                                                                                                                                                                                                                                                                               | 2.162(9)  | Co(4B)-N(38)                                                                                                           | 2.170(8) |
| O(9)-Mn(2B)                                                                                                                                                                                      | 2.233(6)  | O(9A)-Co(5A)                                                                                                                                                                                                                                                                              | 2.262(8)  | Co(5B)-N(61)                                                                                                           | 2.128(9) |
| O(5A)-Mn(2B)                                                                                                                                                                                     | 2.198(6)  | Co(5A)-O(83)                                                                                                                                                                                                                                                                              | 2.101(9)  | Co(5B)-O(9B)                                                                                                           | 2.182(8) |
| O(13)-Mn(3B)                                                                                                                                                                                     | 2.261(6)  | Co(6A)-N(59)                                                                                                                                                                                                                                                                              | 2.15(1)   | Co(6B)-N(57)                                                                                                           | 2.128(8) |
| O(6A)-Mn(3B)                                                                                                                                                                                     | 2.132(6)  | Co(6A)-O(13A)                                                                                                                                                                                                                                                                             | 2.234(7)  | Co(6B)-O(13B)                                                                                                          | 2.183(7) |
|                                                                                                                                                                                                  |           |                                                                                                                                                                                                                                                                                           |           |                                                                                                                        |          |
| N(1)-Mn(1A)-O(1A)                                                                                                                                                                                | 173.3(5)  | N(1)-Co(1A)-N(2)                                                                                                                                                                                                                                                                          | 174.5(4)  | N(37)-Co(1B)-N(39)                                                                                                     | 179.2(4) |
| O(2A)-Mn(2A)-O(1)                                                                                                                                                                                | 174.5(4)  | O(53)-Co(2A)-O(1A)                                                                                                                                                                                                                                                                        | 176.1(4)  | O(81)-Co(2B)-O(1B)                                                                                                     | 171.3(3) |
| O(5)-Mn(3A)-O(3A)                                                                                                                                                                                | 162.3(5)  | O(82)-Co(3A)-O(5A)                                                                                                                                                                                                                                                                        | 179.2(3)  | N(58)-Co(3B)-O(5B)                                                                                                     | 177.5(4) |
| N(2)-Mn(1B)-O(4A)                                                                                                                                                                                | 178.3(3)  | N(4)-Co(4A)-N(3)                                                                                                                                                                                                                                                                          | 178.2(4)  | N(56)-Co(4B)-N(38)                                                                                                     | 179.3(4) |
| O(5A)-Mn(2B)-O(9)                                                                                                                                                                                | 173.9(3)  | O(83)-Co(5A)-O(9A)                                                                                                                                                                                                                                                                        | 175.7(4)  | N(61)-Co(5B)-O(9B)                                                                                                     | 173.7(4) |
| O(6A)-Mn(3B)-O(13)                                                                                                                                                                               | 171.5(3)  | N(59)-Co(6A)-O(13A)                                                                                                                                                                                                                                                                       | 177.5(4)  | N(57)-Co(6B)-O(13B)                                                                                                    | 179.2(4) |
|                                                                                                                                                                                                  |           |                                                                                                                                                                                                                                                                                           |           |                                                                                                                        |          |
| <b>[Cu<sub>6</sub>(ClO<sub>4</sub>)<sub>8</sub>(CH<sub>3</sub>CN)<sub>4</sub>L<sub>12</sub>]<b>4ClO<sub>4</sub>·5C<sub>7</sub>H<sub>8</sub></b></b>                                              |           | <b>[Zn<sub>6</sub>(ClO<sub>4</sub>)<sub>4</sub>(CH<sub>3</sub>CN)<sub>2</sub>(H<sub>2</sub>O)<sub>6</sub>L<sub>12</sub>]<b>8ClO<sub>4</sub>·CH<sub>3</sub>CN·5C<sub>7</sub>H<sub>8</sub></b></b>                                                                                          |           | <b>[Cl@Cu<sub>2</sub>(ClO<sub>4</sub>)<sub>2</sub>L<sub>4</sub>]<b>ClO<sub>4</sub>·4C<sub>7</sub>H<sub>8</sub></b></b> |          |
| Cu(1)-N(1)                                                                                                                                                                                       | 2.361(8)  | O(1A)-Zn(1A)                                                                                                                                                                                                                                                                              | 2.15(2)   | Cu(1)-N(1C)                                                                                                            | 2.026(4) |
| Cu(1)-O(17)                                                                                                                                                                                      | 2.595(6)  | N(1)-Zn(1A)                                                                                                                                                                                                                                                                               | 2.196(9)  | Cu(1)-N(1D)                                                                                                            | 2.030(3) |
| Cu(2)-O(1)                                                                                                                                                                                       | 2.469(7)  | O(1)-Zn(2A)                                                                                                                                                                                                                                                                               | 2.29(1)   | Cu(1)-N(1B)                                                                                                            | 2.042(3) |
| Cu(2)-O(21)                                                                                                                                                                                      | 2.379(6)  | Zn(2A)-O(2A)                                                                                                                                                                                                                                                                              | 2.29(2)   | Cu(1)-N(1A)                                                                                                            | 2.047(3) |
| N(2)-Cu(3)                                                                                                                                                                                       | 2.401(8)  | O(5)-Zn(3A)                                                                                                                                                                                                                                                                               | 2.38(1)   | Cu(1)-O(1)                                                                                                             | 2.379(3) |
| Cu(3)-O(5)                                                                                                                                                                                       | 2.544(7)  | Zn(3A)-O(3A)                                                                                                                                                                                                                                                                              | 2.15(1)   | Cu(1)-Cl(1)                                                                                                            | 2.661(1) |
| N(3)-Cu(4)                                                                                                                                                                                       | 2.343(7)  | Zn(1B)-O(1B)                                                                                                                                                                                                                                                                              | 2.111(6)  | Cl(1)-Cu(2)                                                                                                            | 2.672(1) |
| Cu(4)-O(25)                                                                                                                                                                                      | 2.611(8)  | Zn(1B)-N(2)                                                                                                                                                                                                                                                                               | 2.239(8)  | Cu(2)-N(2B)                                                                                                            | 2.037(4) |
| Cu(5)-O(29)                                                                                                                                                                                      | 2.405(7)  | O(9)-Zn(2B)                                                                                                                                                                                                                                                                               | 2.251(6)  | Cu(2)-N(2D)                                                                                                            | 2.038(3) |
| Cu(5)-O(9)                                                                                                                                                                                       | 2.451(8)  | Zn(2B)-O(2B)                                                                                                                                                                                                                                                                              | 2.148(6)  | Cu(2)-N(2C)                                                                                                            | 2.040(3) |
| N(4)-Cu(6)                                                                                                                                                                                       | 2.449(8)  | O(13)-Zn(3B)                                                                                                                                                                                                                                                                              | 2.272(6)  | Cu(2)-N(2A)                                                                                                            | 2.045(4) |
| Cu(6)-O(13)                                                                                                                                                                                      | 2.495(6)  | Zn(3B)-O(3B)                                                                                                                                                                                                                                                                              | 2.135(7)  | Cu(2)-O(5)                                                                                                             | 2.409(4) |
|                                                                                                                                                                                                  |           |                                                                                                                                                                                                                                                                                           |           |                                                                                                                        |          |
| N(1)-Cu(1)-O17                                                                                                                                                                                   | 176.27(3) | O(1A)-Zn(1A)-N(1)                                                                                                                                                                                                                                                                         | 177.7(6)  | N(1D)-Cu(1)-N(1B)                                                                                                      | 179.3(2) |
| O(1)-Cu(2)-O(21)                                                                                                                                                                                 | 178.58(4) | O(2A)-Zn(2A)-O(1)                                                                                                                                                                                                                                                                         | 167.1(6)  | N(1C)-Cu(1)-N(1A)                                                                                                      | 178.2(1) |
| N(2)-Cu(3)-O(5)                                                                                                                                                                                  | 170.94(4) | O(3A)-Zn(3A)-O(5)                                                                                                                                                                                                                                                                         | 175.6(4)  | O(1)-Cu(1)-Cl(1)                                                                                                       | 174.0(1) |
| N(3)-Cu(4)-O(25)                                                                                                                                                                                 | 176.11(3) | O(1B)-Zn(1B)-N(2)                                                                                                                                                                                                                                                                         | 178.0(3)  | N(2B)-Cu(2)-N(2D)                                                                                                      | 177.8(1) |
| O(9)-Cu(5)-O(29)                                                                                                                                                                                 | 178.62(4) | O(2B)-Zn(2B)-O(9)                                                                                                                                                                                                                                                                         | 178.2(3)  | N(2C)-Cu(2)-N(2A)                                                                                                      | 178.6(1) |
| N(4)-Cu(6)-O(9)                                                                                                                                                                                  | 170.19(3) | O(3B)-Zn(3B)-O(13)                                                                                                                                                                                                                                                                        | 173.7(3)  | O(5)-Cu(2)-Cl(1)                                                                                                       | 178.4(1) |

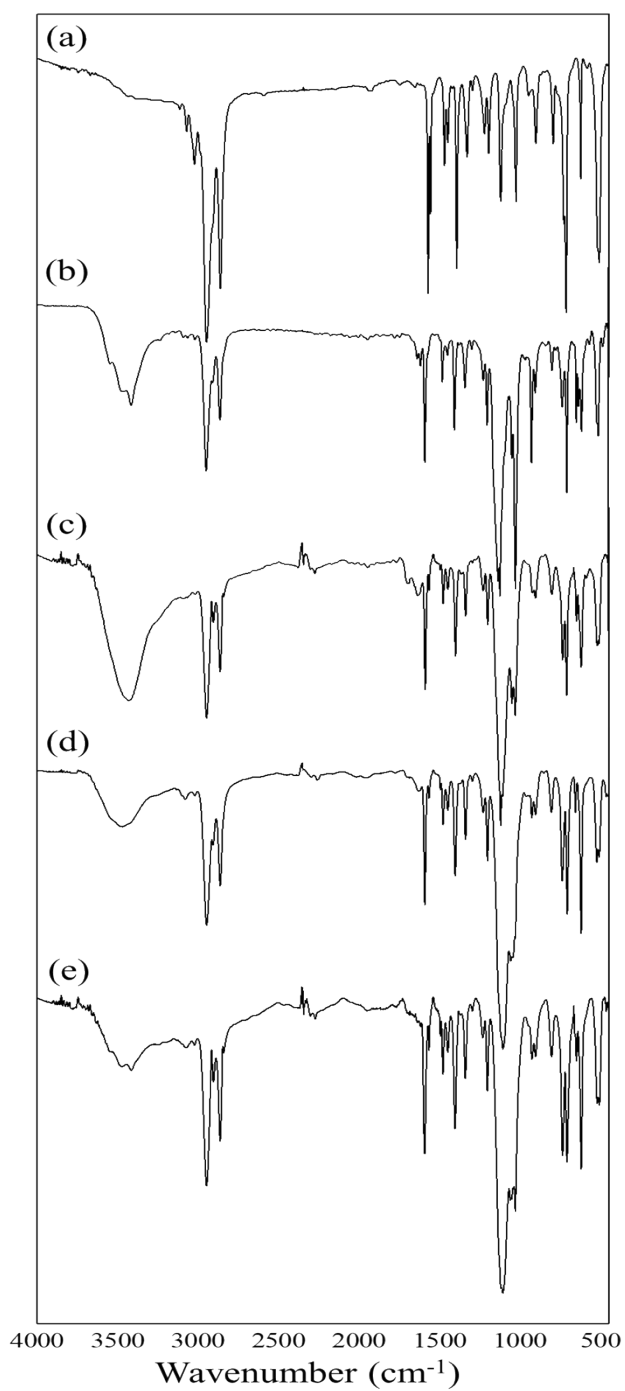

**Fig. S1** IR spectra of L (a),  $[\text{Mn}_6(\text{ClO}_4)_4(\text{CH}_3\text{CN})_2(\text{H}_2\text{O})_6\text{L}_{12}]\cdot 8\text{ClO}_4\cdot \text{CH}_3\text{CN}\cdot 7\text{C}_7\text{H}_8$  (b),  $[\text{Co}_6(\text{ClO}_4)_4(\text{CH}_3\text{CN})_7(\text{H}_2\text{O})\text{L}_{12}][\text{Co}_6(\text{ClO}_4)_4(\text{CH}_3\text{CN})_5(\text{H}_2\text{O})_3\text{L}_{12}]\cdot 16\text{ClO}_4\cdot 6\text{C}_7\text{H}_8$  (c),  $[\text{Cu}_6(\text{ClO}_4)_8(\text{CH}_3\text{CN})_4\text{L}_{12}]\cdot 4\text{ClO}_4\cdot 5\text{C}_7\text{H}_8$  (d), and  $[\text{Zn}_6(\text{ClO}_4)_4(\text{CH}_3\text{CN})_2(\text{H}_2\text{O})_6\text{L}_{12}]\cdot 8\text{ClO}_4\cdot \text{CH}_3\text{CN}\cdot 5\text{C}_7\text{H}_8$  (e).

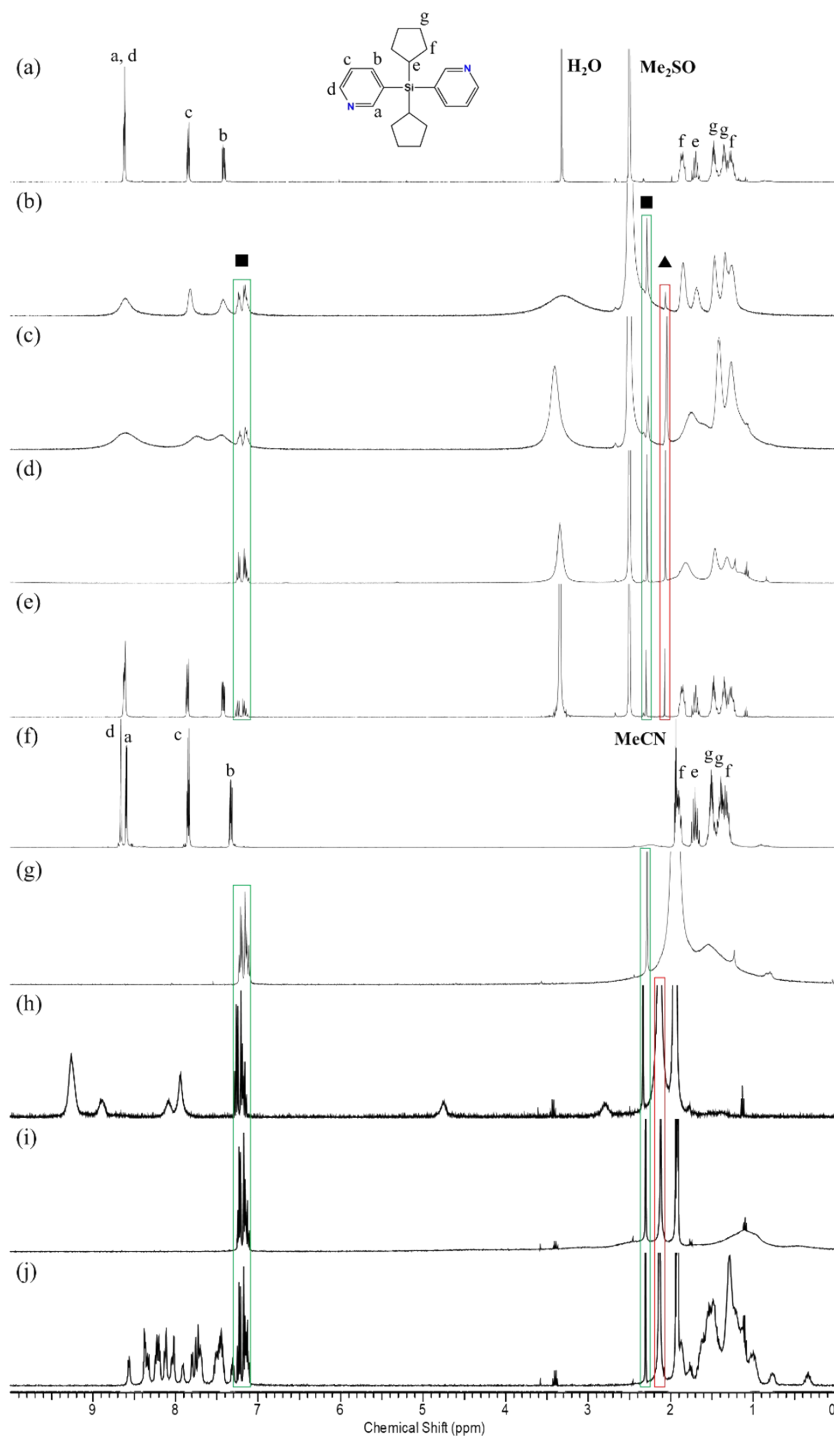

**Fig. S2**  $^1\text{H}$  NMR spectra of L (a, f),  $[\text{Mn}_6(\text{ClO}_4)_4(\text{CH}_3\text{CN})_2(\text{H}_2\text{O})_6\text{L}_{12}]\text{8ClO}_4 \cdot \text{CH}_3\text{CN} \cdot 7\text{C}_7\text{H}_8$  (b, g),  $[\text{Co}_6(\text{ClO}_4)_4(\text{CH}_3\text{CN})_7(\text{H}_2\text{O})\text{L}_{12}][\text{Co}_6(\text{ClO}_4)_4(\text{CH}_3\text{CN})_5(\text{H}_2\text{O})_3\text{L}_{12}]\text{16ClO}_4 \cdot 6\text{C}_7\text{H}_8$  (c, h),  $[\text{Cu}_6(\text{ClO}_4)_8(\text{CH}_3\text{CN})_4\text{L}_{12}]\text{4ClO}_4 \cdot 5\text{C}_7\text{H}_8$  (d, i), and  $[\text{Zn}_6(\text{ClO}_4)_4(\text{CH}_3\text{CN})_2(\text{H}_2\text{O})_6\text{L}_{12}]\text{8ClO}_4 \cdot \text{CH}_3\text{CN} \cdot 5\text{C}_7\text{H}_8$  (e, j) in  $\text{Me}_2\text{SO}-d_6$  (dissociated; a - f) and  $\text{CD}_3\text{CN}$  (dissolved; g - j). Square and triangle indicate toluene and acetonitrile, respectively.

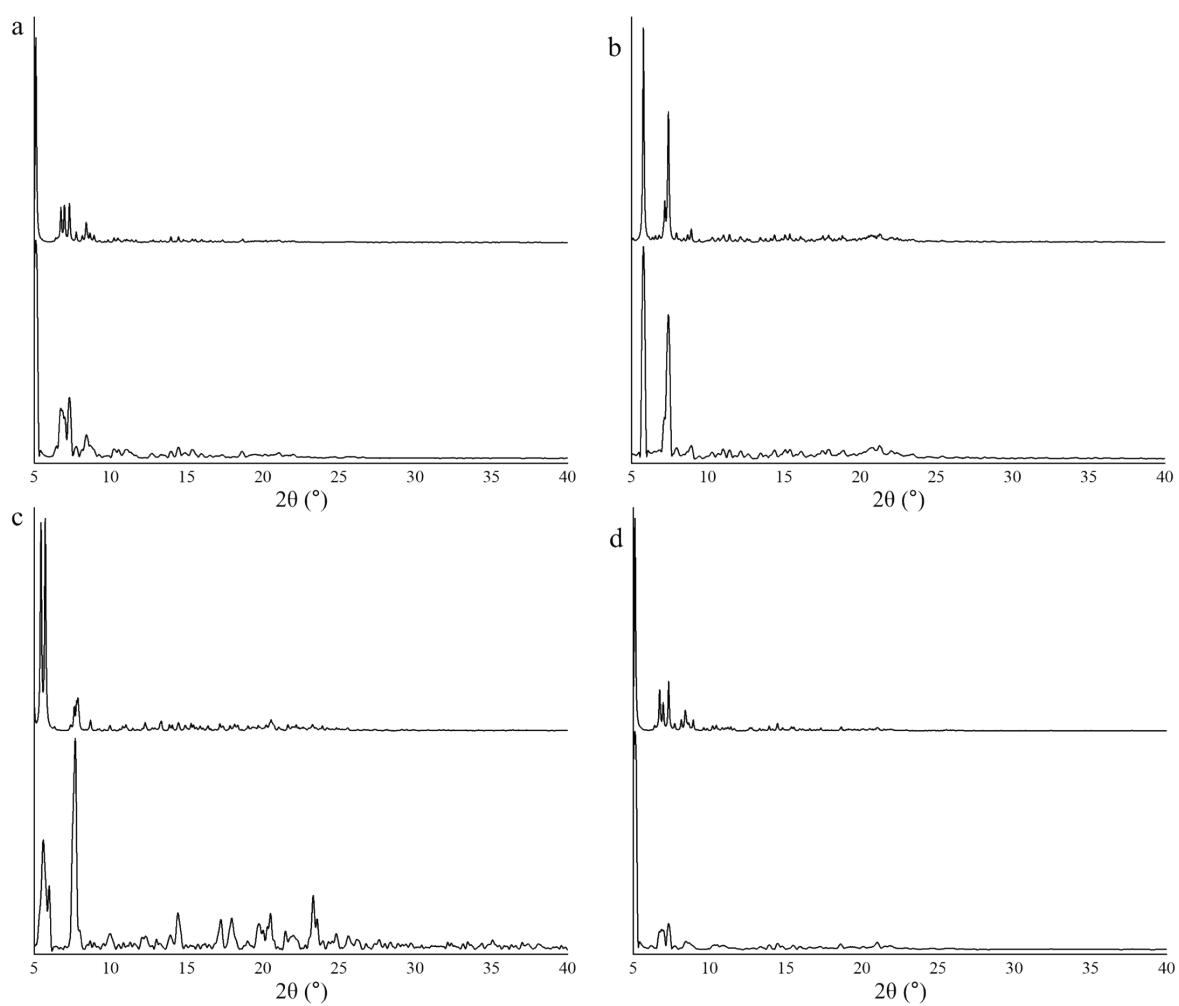

**Fig. S3** PXR D patterns obtained through calculations (top) and experiments (bottom) in  $[\text{Mn}_6(\text{ClO}_4)_4(\text{CH}_3\text{CN})_2(\text{H}_2\text{O})_6\text{L}_{12}]8\text{ClO}_4 \cdot \text{CH}_3\text{CN} \cdot 7\text{C}_7\text{H}_8$  (a),  $[\text{Co}_6(\text{ClO}_4)_4(\text{CH}_3\text{CN})_7(\text{H}_2\text{O})\text{L}_{12}][\text{Co}_6(\text{ClO}_4)_4(\text{CH}_3\text{CN})_5(\text{H}_2\text{O})_3\text{L}_{12}]16\text{ClO}_4 \cdot 6\text{C}_7\text{H}_8$  (b),  $[\text{Cu}_6(\text{ClO}_4)_8(\text{CH}_3\text{CN})_4\text{L}_{12}]4\text{ClO}_4 \cdot 5\text{C}_7\text{H}_8$  (c), and  $[\text{Zn}_6(\text{ClO}_4)_4(\text{CH}_3\text{CN})_2(\text{H}_2\text{O})_6\text{L}_{12}]8\text{ClO}_4 \cdot \text{CH}_3\text{CN} \cdot 5\text{C}_7\text{H}_8$  (d).

(a)

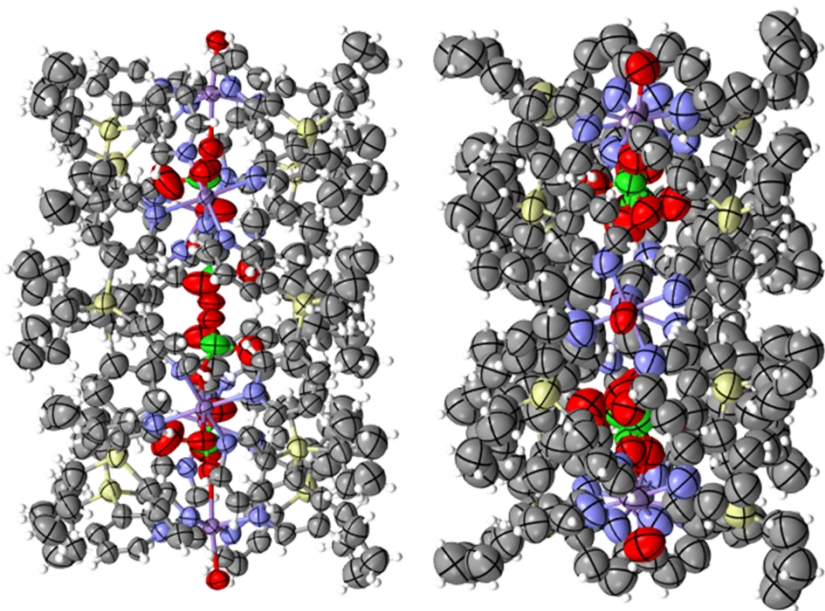

(b)

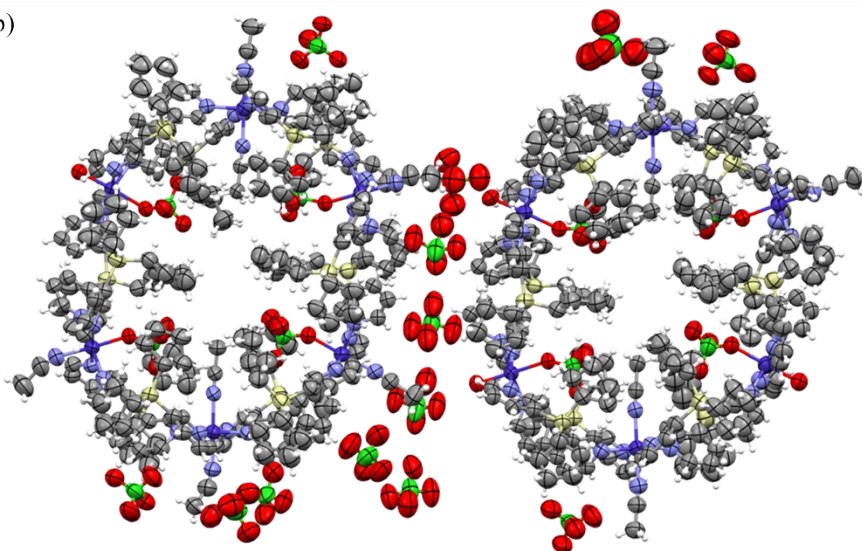

(c)

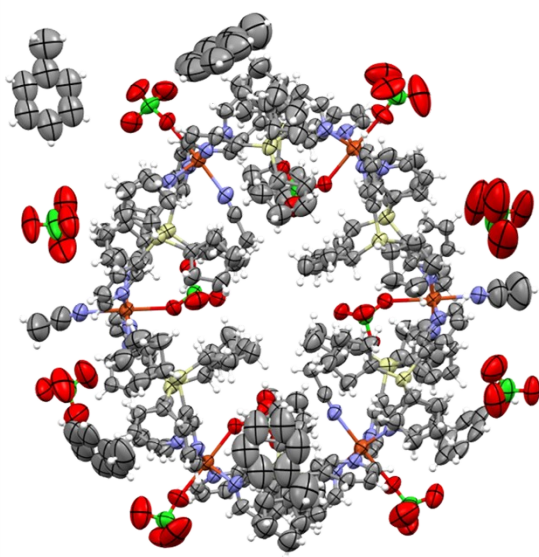

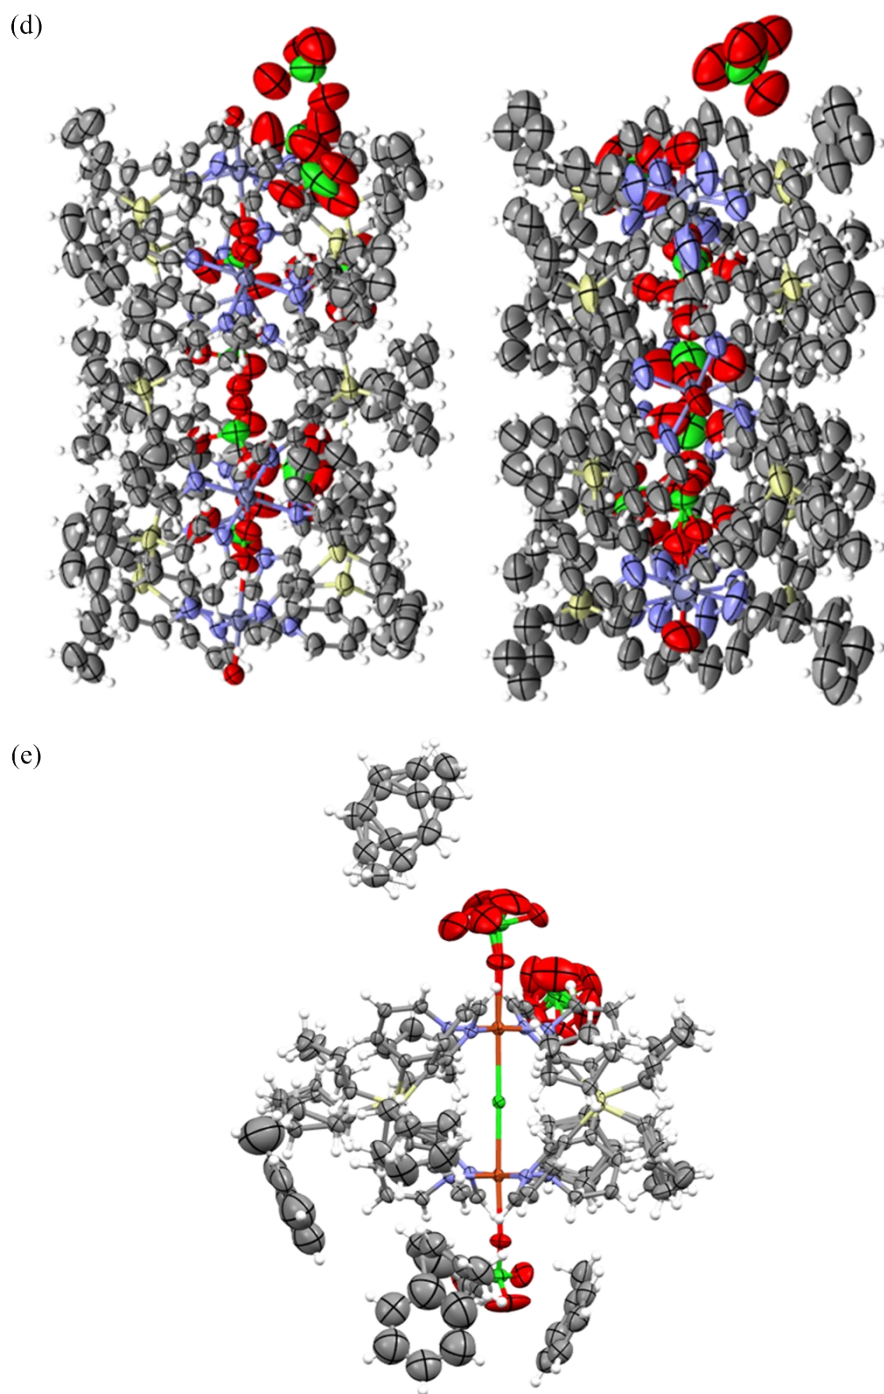

**Fig. S4** The ellipsoidal model of  $[\text{Mn}_6(\text{ClO}_4)_4(\text{CH}_3\text{CN})_2(\text{H}_2\text{O})_6\text{L}_{12}]\cdot 8\text{ClO}_4\cdot \text{CH}_3\text{CN}\cdot 7\text{C}_7\text{H}_8$  (a),  $[\text{Co}_6(\text{ClO}_4)_4(\text{CH}_3\text{CN})_7(\text{H}_2\text{O})\text{L}_{12}][\text{Co}_6(\text{ClO}_4)_4(\text{CH}_3\text{CN})_5(\text{H}_2\text{O})_3\text{L}_{12}]\cdot 16\text{ClO}_4\cdot 6\text{C}_7\text{H}_8$  (b),  $[\text{Cu}_6(\text{ClO}_4)_8(\text{CH}_3\text{CN})_4\text{L}_{12}]\cdot 4\text{ClO}_4\cdot 5\text{C}_7\text{H}_8$  (c),  $[\text{Zn}_6(\text{ClO}_4)_4(\text{CH}_3\text{CN})_2(\text{H}_2\text{O})_6\text{L}_{12}]\cdot 8\text{ClO}_4\cdot \text{CH}_3\text{CN}\cdot 5\text{C}_7\text{H}_8$  (d), and  $[\text{Cl}@\text{Cu}_2(\text{ClO}_4)_2\text{L}_4]\cdot \text{ClO}_4\cdot 4\text{C}_7\text{H}_8$  (e).



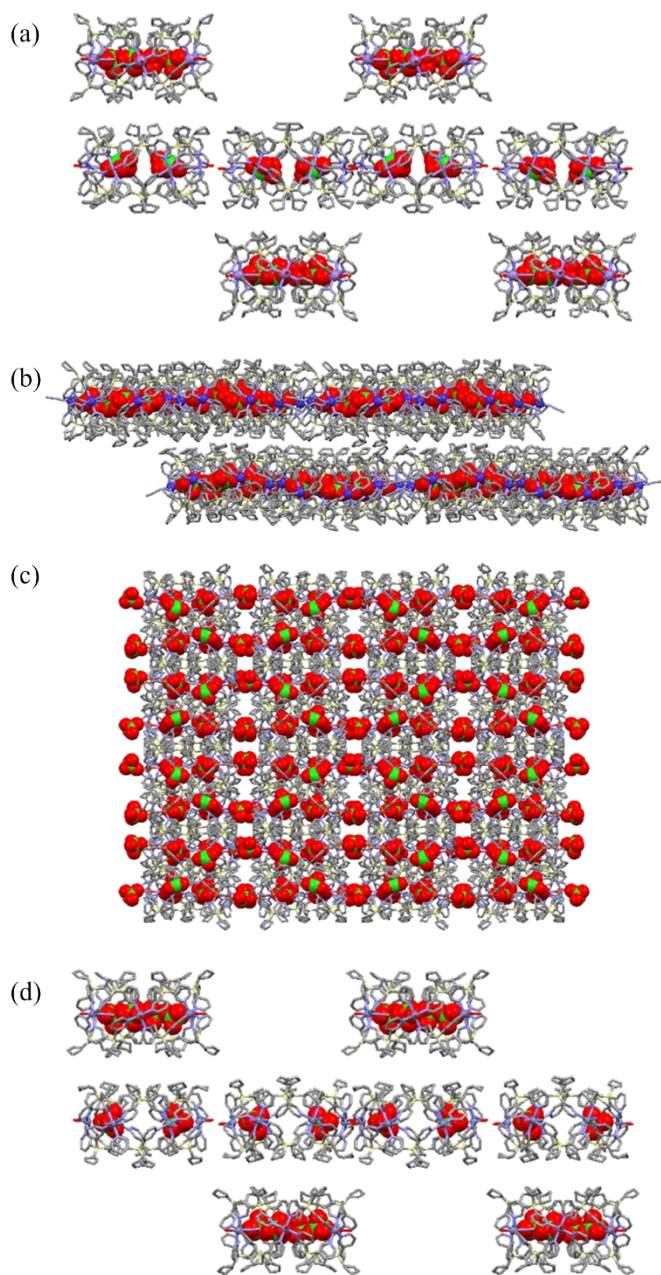

**Fig. S5** The packing modes(top view) for  $[\text{Mn}_6(\text{ClO}_4)_4(\text{CH}_3\text{CN})_2(\text{H}_2\text{O})_6\text{L}_{12}]8\text{ClO}_4 \cdot \text{CH}_3\text{CN} \cdot 7\text{C}_7\text{H}_8$  (a),  $[\text{Co}_6(\text{ClO}_4)_4(\text{CH}_3\text{CN})_7(\text{H}_2\text{O})\text{L}_{12}][\text{Co}_6(\text{ClO}_4)_4(\text{CH}_3\text{CN})_5(\text{H}_2\text{O})_3\text{L}_{12}]16\text{ClO}_4 \cdot 6\text{C}_7\text{H}_8$  (b),  $[\text{Cu}_6(\text{ClO}_4)_8(\text{CH}_3\text{CN})_4\text{L}_{12}]4\text{ClO}_4 \cdot 5\text{C}_7\text{H}_8$  (c), and  $[\text{Zn}_6(\text{ClO}_4)_4(\text{CH}_3\text{CN})_2(\text{H}_2\text{O})_6\text{L}_{12}]8\text{ClO}_4 \cdot \text{CH}_3\text{CN} \cdot 5\text{C}_7\text{H}_8$  (d).

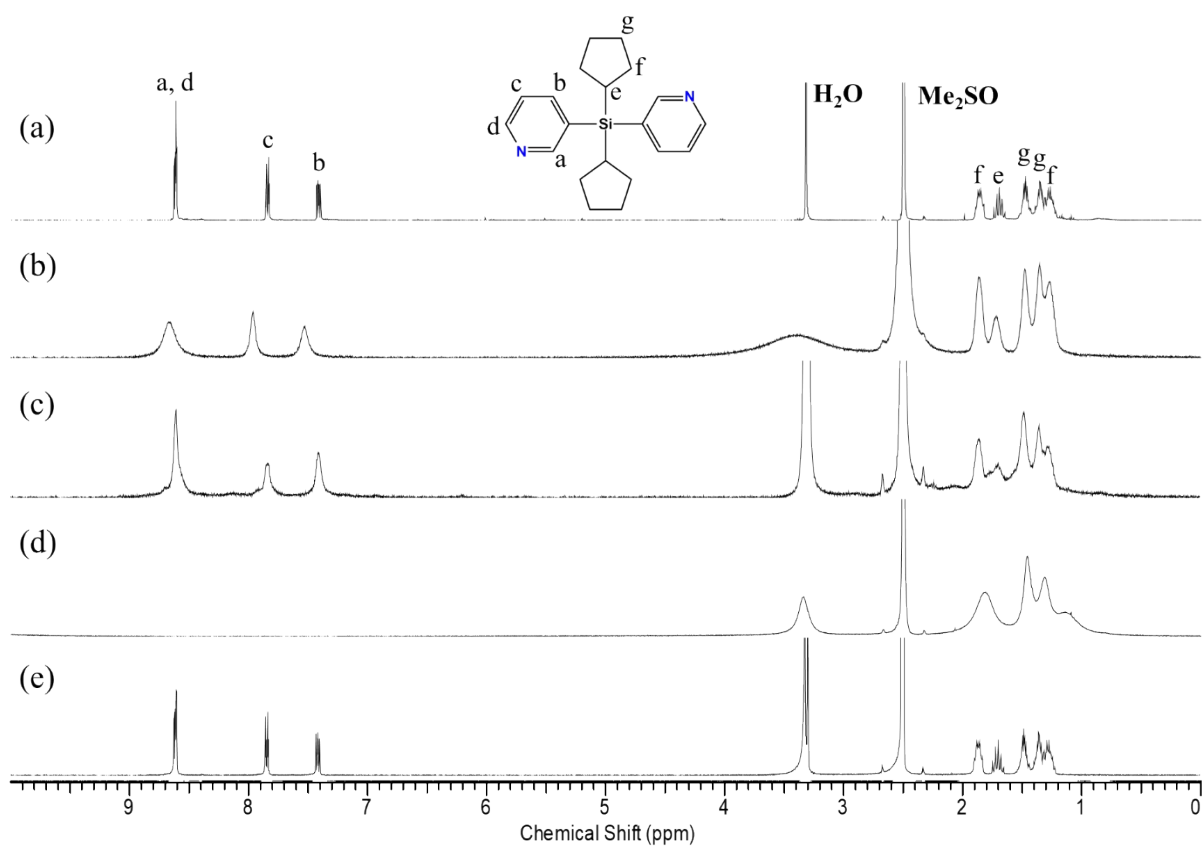

**Fig. S6**  $^1\text{H}$  NMR spectra of L (a),  $[\text{Mn}(\text{ClO}_4)_2\text{L}_2]_n$  (b),  $[\text{Co}(\text{ClO}_4)_2\text{L}_2]_n$  (c),  $[\text{Cu}(\text{ClO}_4)_2\text{L}_2]_n$  (d), and  $[\text{Zn}(\text{ClO}_4)_2\text{L}_2]_n$  (e) after heating up to 170  $^\circ\text{C}$ .

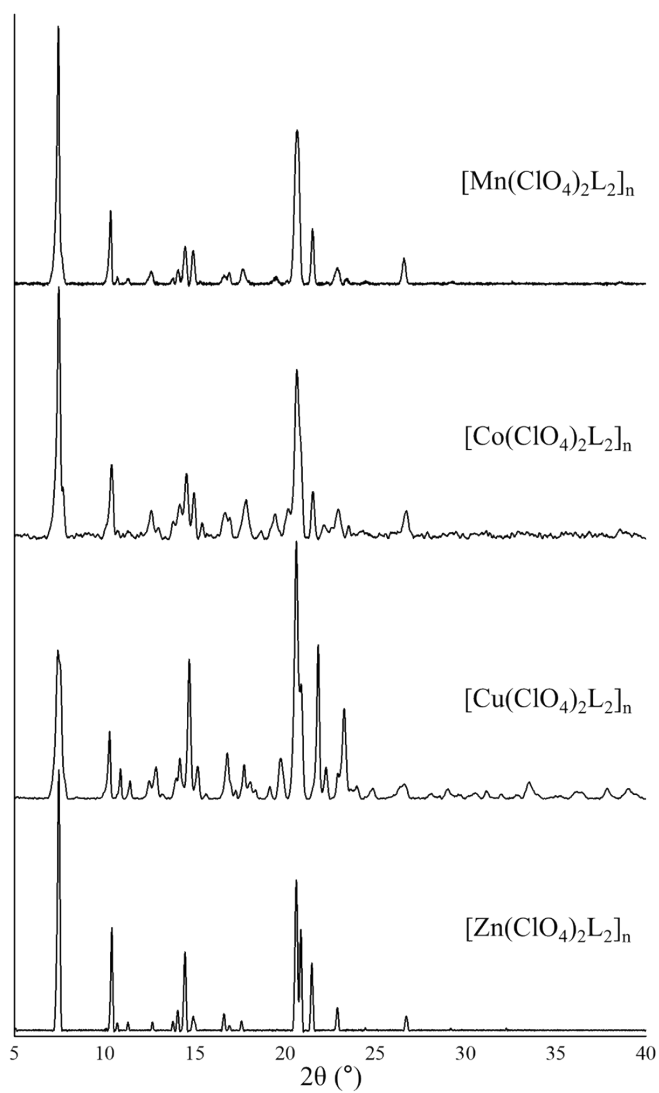

**Fig. S7** PXR D patterns of  $[\text{Mn}(\text{ClO}_4)_2\text{L}_2]_n$ ,  $[\text{Co}(\text{ClO}_4)_2\text{L}_2]_n$ ,  $[\text{Cu}(\text{ClO}_4)_2\text{L}_2]_n$ , and  $[\text{Zn}(\text{ClO}_4)_2\text{L}_2]_n$  after heating up to 170 °C.

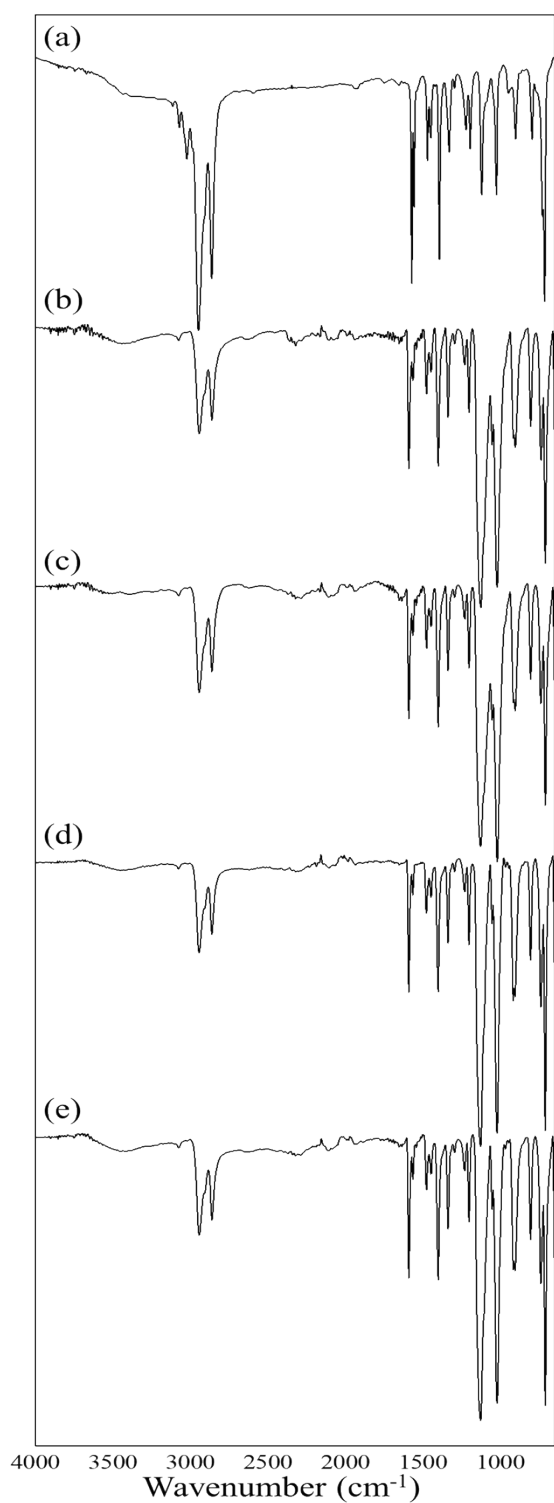

**Fig. S8** IR spectra of L (a),  $[\text{Mn}(\text{ClO}_4)_2\text{L}_2]_n$  (b),  $[\text{Co}(\text{ClO}_4)_2\text{L}_2]_n$  (c),  $[\text{Cu}(\text{ClO}_4)_2\text{L}_2]_n$  (d), and  $[\text{Zn}(\text{ClO}_4)_2\text{L}_2]_n$  (e) after heating up to 170 °C.

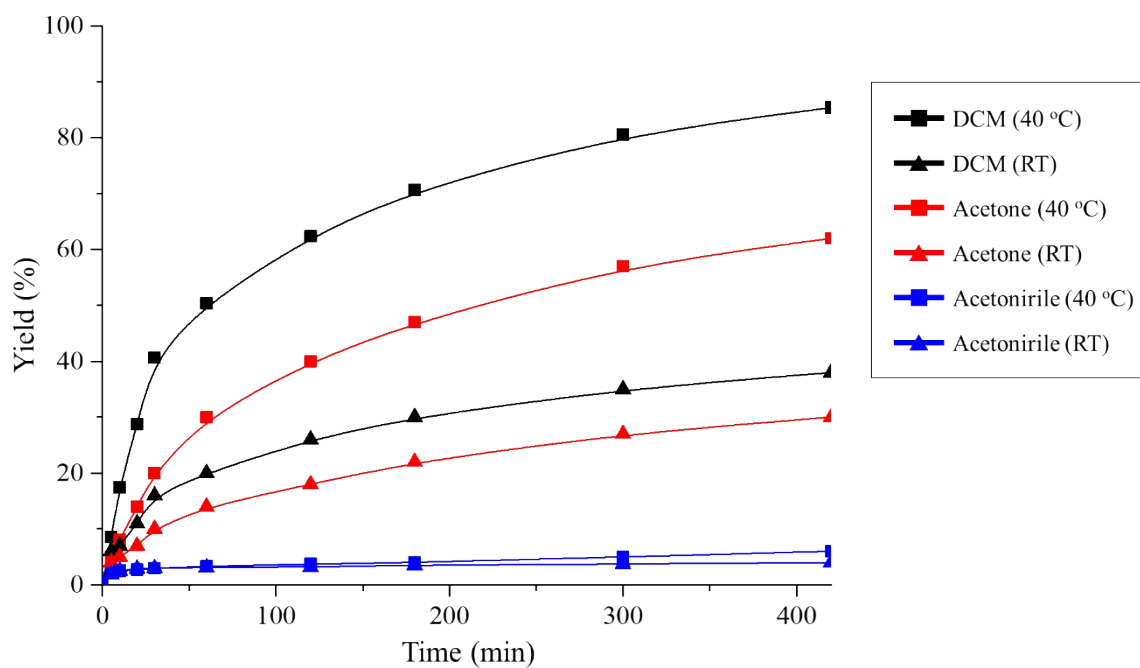

**Fig. S9** The homogeneous catalysis rates of 3,5-di-*tert*-butylcatechol using  $[\text{Cu}_6(\text{ClO}_4)_8(\text{CH}_3\text{CN})_4\text{L}_{12}]\text{4ClO}_4 \cdot 5\text{C}_7\text{H}_8$  in dichloromethane (black line), acetone (red line), and acetonitrile (blue line) at 40 °C (square) and RT (triangle).

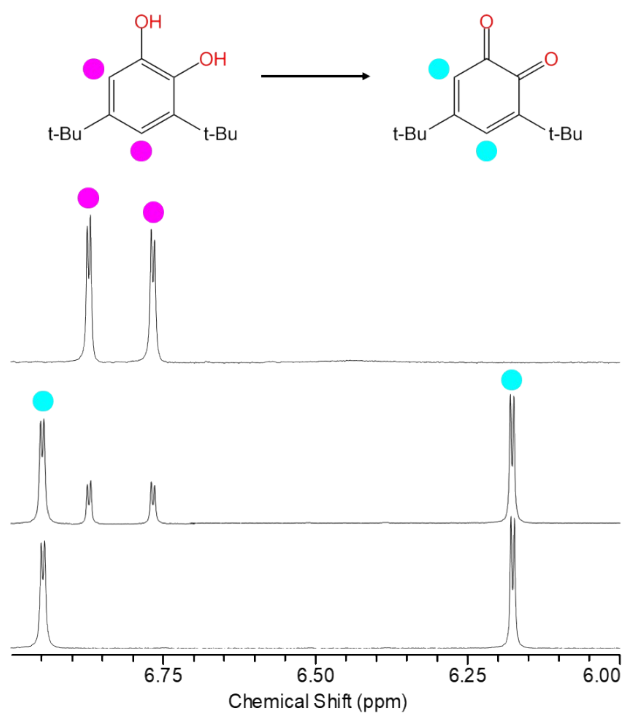

**Fig. S10** <sup>1</sup>H NMR spectral procedure on catalytic oxidation 3,5-di-*tert*-butylcatechol to 3,5-di-*tert*-butylorthoquinone using  $[\text{Cu}_6(\text{ClO}_4)_8(\text{CH}_3\text{CN})_4\text{L}_{12}]4\text{ClO}_4 \cdot 5\text{C}_7\text{H}_8$  in dichloromethane-*d*<sub>2</sub>.

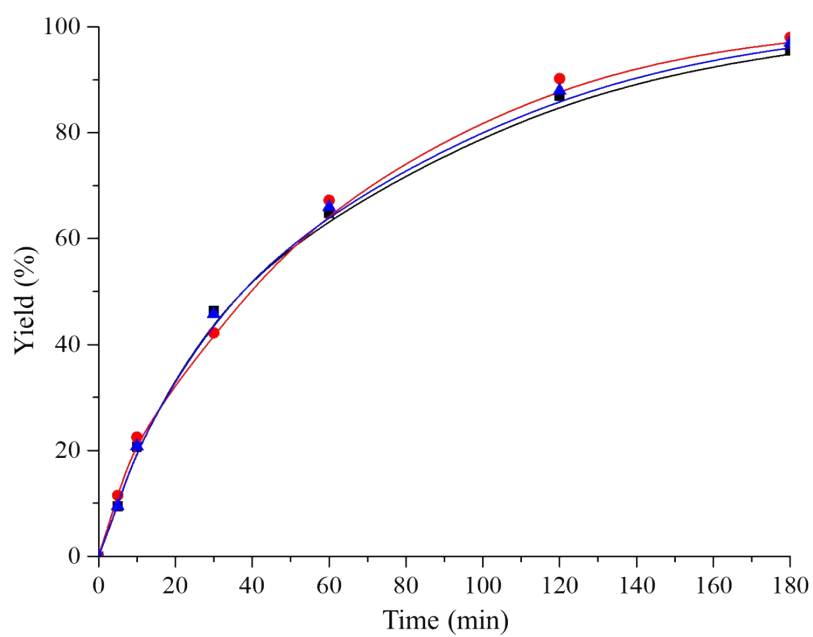

**Fig. S11** Plot showing catalytic yields of transesterification of phenyl acetate using  $[\text{Zn}_6(\text{ClO}_4)_4(\text{CH}_3\text{CN})_2(\text{H}_2\text{O})_6\text{L}_{12}]\cdot 8\text{ClO}_4\cdot\text{CH}_3\text{CN}\cdot 5\text{C}_7\text{H}_8$  (black line),  $[\text{Zn}(\text{ClO}_4)_2\text{L}_2]$  (red line), and  $\text{Zn}(\text{ClO}_4)_2 + \text{L}$  (blue line) in methanol at 50 °C.

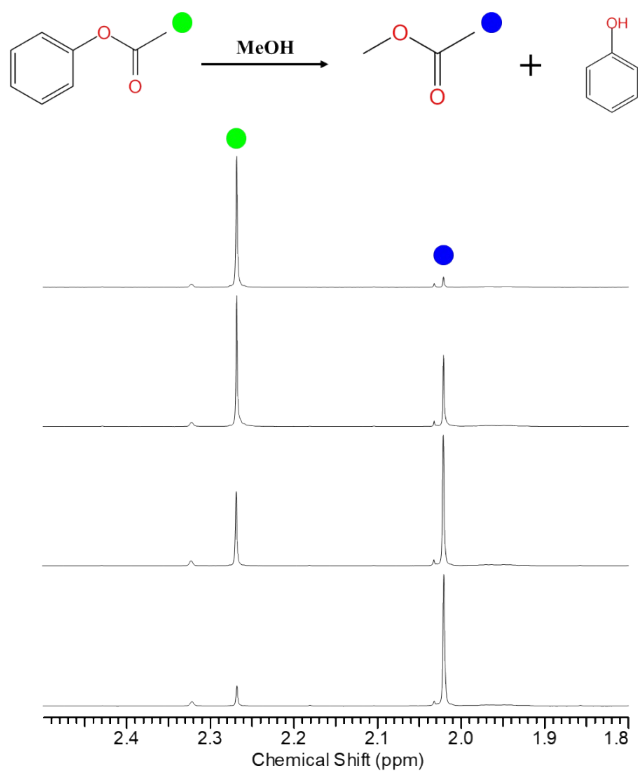

**Fig. S12** <sup>1</sup>H NMR spectral procedure on transesterification of phenyl acetate using  $[\text{Zn}_6(\text{ClO}_4)_4(\text{CH}_3\text{CN})_2(\text{H}_2\text{O})_6\text{L}_{12}]\cdot 8\text{ClO}_4\cdot\text{CH}_3\text{CN}\cdot 5\text{C}_7\text{H}_8$  in methanol at 50 °C.
